# Supplementary figures and images for: Single-cell transcriptomics of human islet ontogeny defines the molecular basis of β-cell dedifferentiation in T2D
Source: PubMed Central journal article supplement — Mol Metab. 2020 Jul 30;42:101057. doi: 10.1016/j.molmet.2020.101057 (PMC7471622; doi:10.1016/j.molmet.2020.101057), 2020-07-30

Figure S1

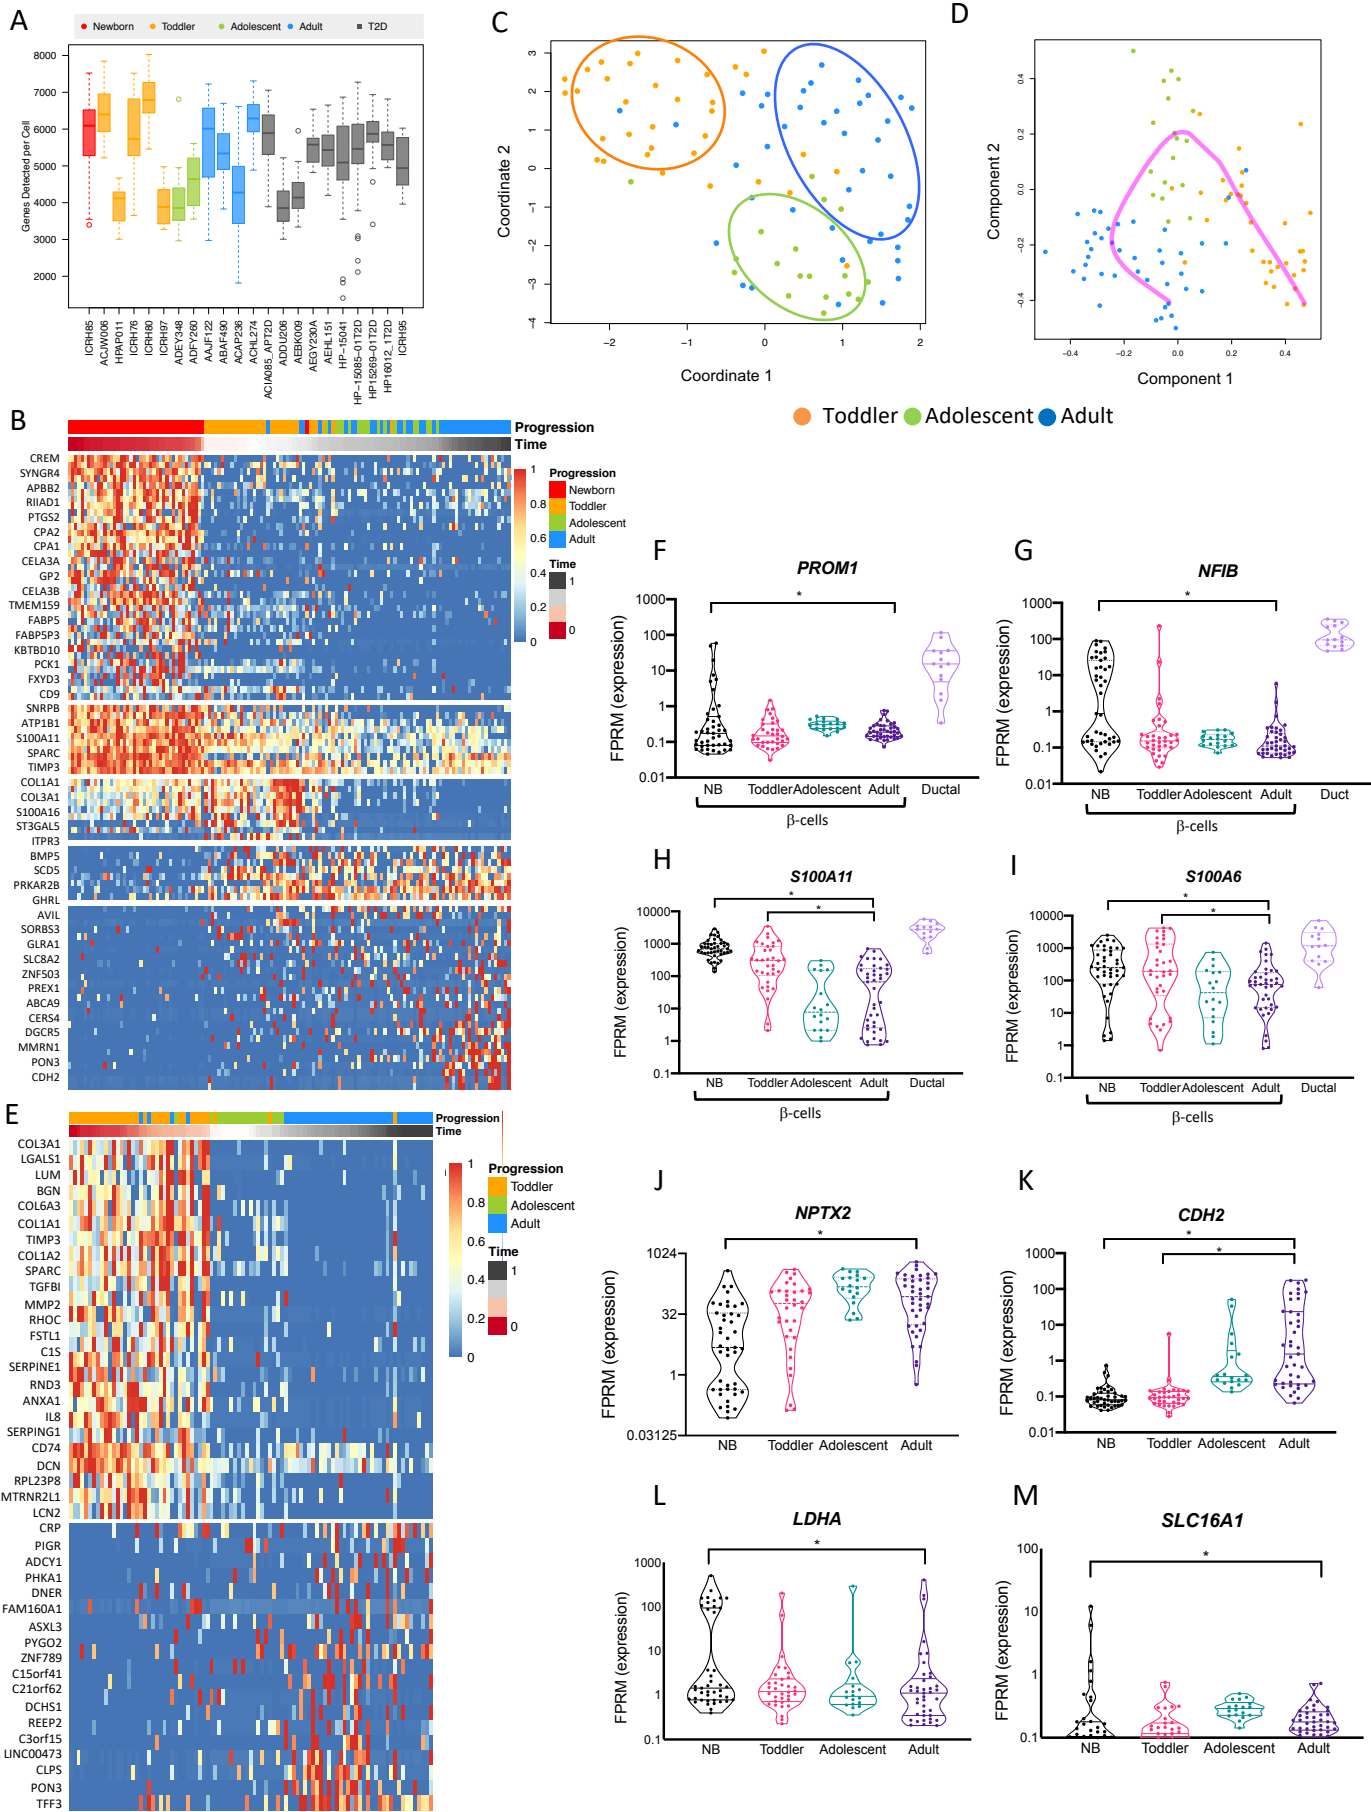

Figure S2 related to figure 4

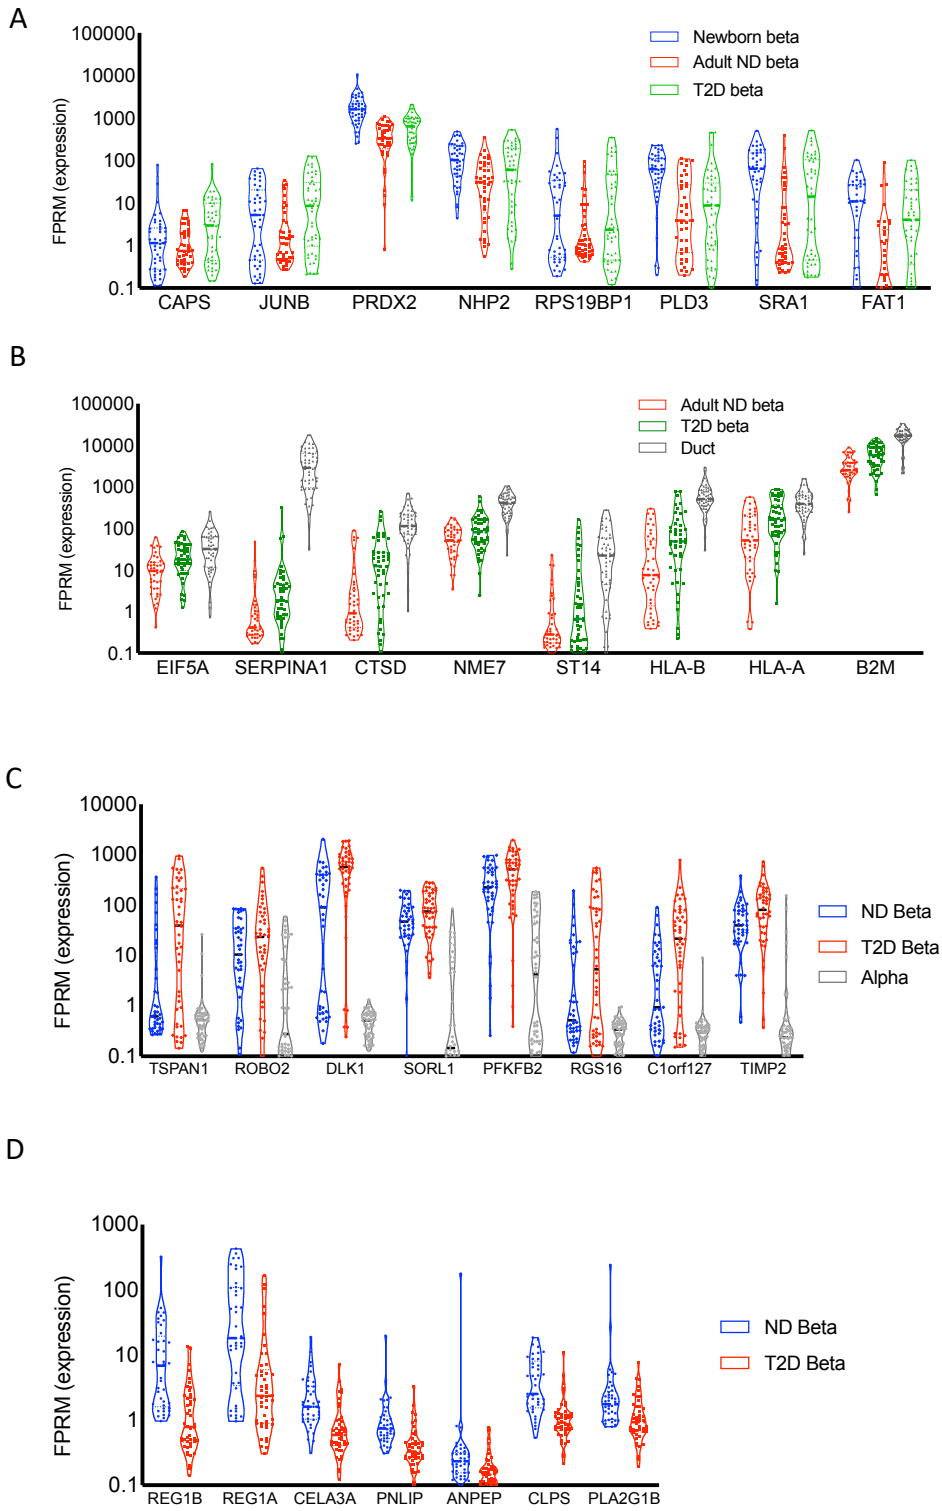

Figure S3 related to figure 5

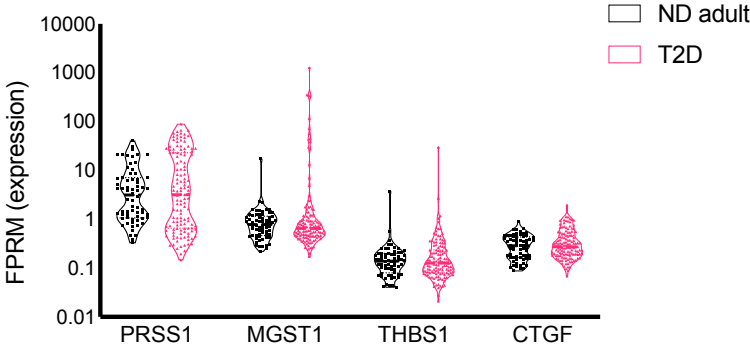

Supplement: mmc10.pdf [file mmc10.pdf]
